# Supplementary material for: ReCirc: prediction of circRNA expression and function through probe reannotation of non-circRNA microarrays
Source: Royal Society of Chemistry journal article supplement (doi:10.1039/c8mo00252e), 2019-03-27
Supplement: c8mo00252e5.pdf [file c8mo00252e5.pdf]

**Table S4.** The total numbers and how many circRNAs did not overlap with RNase R+ in Hela cell

| RNase R+ replicates | Total CircRNAs | Overlapping number | Not Overlapping number |
|---------------------|----------------|--------------------|------------------------|
| replicate 1         | 5741           | 113                | 5256                   |
| replicate 2         | 8263           | 174                | 5159                   |
| replicate 3         | 12984          | 275                | 5094                   |
| merge               | 17591          | 388                | 4981                   |

line.

# The total number of ReCirc circRNAs in Hela cell is 5369.
